# Supplementary material
Source: Springer Nature journal article supplement (https://www.springermedizin.de/resource/supplementary/12875_2012_793_MOESM2_ESM.pdf/9435118)

# Swiss primary care (FIRE) – January 1, 2009 to July 31, 2011

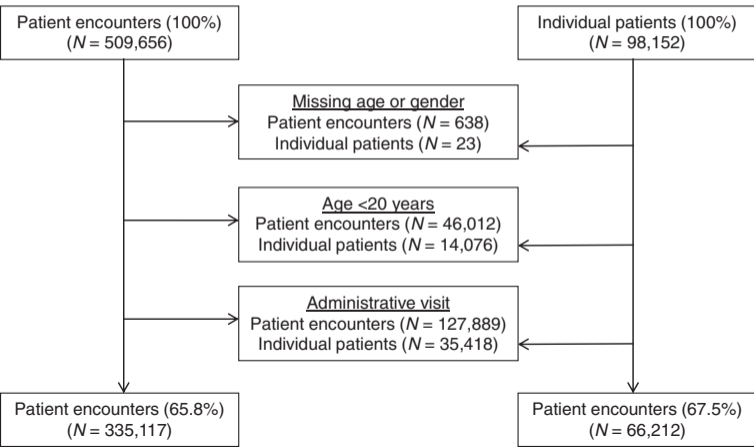

Supplement: MOESM2 [file 9435118]
